# Supplementary material for: Dual microphallid infections in shore crabs (Carcinus maenas): Site-level variation and phylogenetic insights in a globally invasive host
Source: Research Square preprint supplement (doi:10.21203/rs.3.rs-7425079/v1), 2025-09-10
Supplement: Supplementary file 1 [file 622d955155fe2d0eb38a84ec.docx]

*Table S1.* Summary of biometric data for shore crabs (*Carcinus maenas*) surveyed between April and August.

| Site(s) | Month | No. of crabs surveyed | Mean CW & (range) mm | M:F ratio | Epibionts (%) | Limb loss (%) | Shell Disease (%) | Spirorbis (%) | Colour morphs  (G:Y:R) |
| --- | --- | --- | --- | --- | --- | --- | --- | --- | --- |
| Mumbles | April | 30 | 47.9 (29 – 61) | 13:17 | 3.3% | 20.0% | 13.3% | 6.7% | 1:1:28 |
| “ | June | 24 | 45.6 (22 – 58) | 10:14 | 16.7% | 29.2% | 16.7% | 0.0% | 6:0:18 |
| “ | August | 21 | 32.5 (17 – 56) | 15:6 | 14.3% | 33.3% | 9.5% | 4.8% | 17:2:2 |
| Oxwich | April | 30 | 33.9 (18 – 53) | 15:15 | 6.7% | 13.3% | 3.3% | 0.0% | 9:0:21 |
| “ | June | 28 | 37 (20 – 61) | 15:13 | 25% | 35.7% | 3.6% | 0.0% | 17:2:9 |
| “ | August | 30 | 36.5 (22 – 57) | 18:12 | 10.0% | 20% | 0.0% | 3.3% | 18:6:6 |

*Table S2*. Accession numbers, deposited in GenBank, and corresponding sampling numbers for all trematode-positive animals successfully sequenced from this study.

| **GenBankID** | **Sample** | **Primers** | **Sample Type** |
| --- | --- | --- | --- |
| PQ314574 | Apr_Mum_04 | LSU-5/LSU-1500R | Metacercariae |
| PQ314575 | Apr_Mum_07 | LSU-5/LSU-1500R | Metacercariae |
| PQ314576 | Apr_Mum_25 | LSU-5/LSU-1500R | Metacercariae |
| PQ314577 | Apr_Ox_09 | LSU-5/LSU-1500R | Metacercariae |
| PQ314578 | Apr_Ox_14 | LSU-5/LSU-1500R | Metacercariae |
| PQ314583 | Jun_Mum_01 | LSU-5/LSU-1500R | Metacercariae |
| PQ314584 | Jun_Mum_02 | LSU-5/LSU-1500R | Metacercariae |
| PQ314585 | Jun_Mum_03 | LSU-5/LSU-1500R | Metacercariae |
| PQ314586 | Jun_Mum_04a | LSU-5/LSU-1500R | Metacercariae |
| PQ314588 | Jun_Mum_06 | LSU-5/LSU-1500R | Metacercariae |
| PQ314589 | Jun_Mum_15 | LSU-5/LSU-1500R | Metacercariae |
| PQ314590 | Jun_Mum_18 | LSU-5/LSU-1500R | Metacercariae |
| PQ314591 | Jun_Mum_22 | LSU-5/LSU-1500R | Metacercariae |
| PQ314592 | Jun_Mum_12 | LSU-5/LSU-1500R | Metacercariae |
| PQ314598 | Jun_Ox_01 | LSU-5/LSU-1500R | Metacercariae |
| PQ314599 | Jun_Ox_04 | LSU-5/LSU-1500R | Metacercariae |
| PQ314600 | Jun_Ox_06 | LSU-5/LSU-1500R | Metacercariae |
| PQ314601 | Jun_Ox_12 | LSU-5/LSU-1500R | Metacercariae |
| PQ314602 | Jun_Ox_13 | LSU-5/LSU-1500R | Metacercariae |
| PQ314603 | Jun_Ox_15 | LSU-5/LSU-1500R | Metacercariae |
| PQ314604 | Jun_Ox_17 | LSU-5/LSU-1500R | Metacercariae |
| PQ314605 | Jun_Ox_21 | LSU-5/LSU-1500R | Metacercariae |
| PQ314607 | Aug_Mum_14a | LSU-5/LSU-1500R | Metacercariae |
| PQ314608 | Aug_Mum_14b | LSU-5/LSU-1500R | Metacercariae |
| PQ314609 | Aug_Mum_15 | LSU-5/LSU-1500R | Metacercariae |
| PQ314610 | Aug_Ox_15 | LSU-5/LSU-1500R | Metacercariae |

*Table S3*. Full models used in order to predict response variable of presence of digenean trematodes before reduction. Asterisk denotes significance (α ≤ 0.05).

|  | **Parameter** | **Estimate**  **(slope)** | **p** |
| --- | --- | --- | --- |
| Model 1 (Combined Population) |  |  |  |
| TremPres ~ Location + Month + Sex + Fouling  +  Carapace.Width + Colour + Hemo.col | Location(Oxwich) | -0.90259 | 0.0756 |
| **AIC:** 173.9 | Month(June) | -0.89087 | 0.1355 |
| Month(August) | -0.42863 | 0.5039 |
| Sex(Male) | -0.51520 | 0.2662 |
| Fouling | 1.70612 | 0.1568 |
| Colour(Red) | -0.23186 | 0.6890 |
| Colour(Yellow) | -1.05689 | 0.2372 |
| Carapace Width | 0.05987 | 0.0232 * |
| Pigment Loss | -0.06769 | 0.9171 |
| Haemolymph Opacity | -1.26108 | 0.1778 |
|  |  |  |
| Model 2 (Mumbles) | | | | |
| TremPres ~ Month + Sex + Fouling  +  Carapace.Width + Colour + Hemo.col + Pigment.Loss | Month(June) | -0.26906 | 0.764 |
| Month(August) | -2.11728 | 0.221 |
| Sex(Male) | -0.09234 | 0.904 |
| Fouling | 0.71724 | 0.627 |
| **AIC:** 76.2 | Carapace Width | 0.01891 | 0.670 |
| Colour(Red) | -2.16780 | 0.154 |
| Colour(Yellow) | 15.11622 | 0.994 |
| Haemolymph Opacity | -1.00016 | 0.297 |
| Pigment Loss | -0.50711 | 0.523 |
| Model 3 (Oxwich) | | | | |
| TremPres ~ Month + Sex + Fouling  +  Carapace.Width + Colour + Hemo.col + Pigment.Loss | Month(June) | -1.23026 | 0.12898 |
| Month(August) | -0.24251 | 0.77545 |
| Sex(Male) | -0.53551 | 0.36559 |
| Fouling | 30.57478 | 0.99237 |
| **AIC:** 96.5 | Carapace Width | 0.11640 | 0.00716 ** |
| Colour(Red) | 0.22229 | 0.77555 |
| Colour(Yellow) | -2.88777 | 0.02389 * |
| Haemolymph Opacity | -16.95597 | 0.99402 |
| Pigment Loss | 2.02974 | 0.20562 |

*Table S4****.*** *Sample information for each gel image (Supplementary Figures S1-10). The table lists the gel number (Gel 1–8), the corresponding gel file name, and all sample codes included on that gel. Sample aliases (e.g., 1, 1a, 1d) follow the mapping used throughout the study. Lanes are labelled in* ***red*** *on the gel images to indicate sample order*

| **Gel No.** | **File Name** | **Sample Codes on Gel** | **Aliases (from mapping)** | **Note** |
| --- | --- | --- | --- | --- |
| Gel 1 | 020524_LSUF-LSU1500_AMCP_NPC.tif | AMCP1–AMCP31 | 1–17 | Lanes labelled in red |
| Gel 2 | 070524_LSUF-LSU1500_8AOCP_3AMCM.tif | AOCP8, AOCP9, AOCP13, AOCP15, AOCP16, AOCP19, AOCP20, AOCP25; AMCM3 | 1d, 2d, 3d, 4d, 5d, 6d, 7d, 8d; 3a | Lanes labelled in red |
| Gel 3 | 070524_LSUF-LSU1500_AMCM.tif | AMCM1–AMCM30 | 1a–25a, 1b–3b | Lanes labelled in red |
| Gel 4 | 070524_LSUF-LSU1500_AOCM.tif | AOCM1–AOCM30 | 1c–24c | Lanes labelled in red |
| Gel 5 | 140824_LSUF-LSU1500_AUCM(I1,I2,I3,I4,p,n).tif | AUCM (injected samples I1–I4, positive, negative) | L1-l4 | Lanes labelled in file title |
| Gel 6 | 170624_LSUF-LSU1500_JMCM.tif | JMCM1–JMCM24 | 1e–23e | Lanes labelled in red |
| Gel 7 | 170624-LSUF-LSU1500_3JMCP_5JOCP.tif | JMCP2, JMCP8, JMCP27; JOCP10, JOCP13, JOCP17, JOCP18, JOCP20 | 1f, 2f, 3f; 1h–5h | Lanes labelled in red |
| Gel 8 | 170624-LSUF-LSU1500_JOCM.tif | JOCM1–JOCM23 | 1g–18g | Lanes labelled in red |


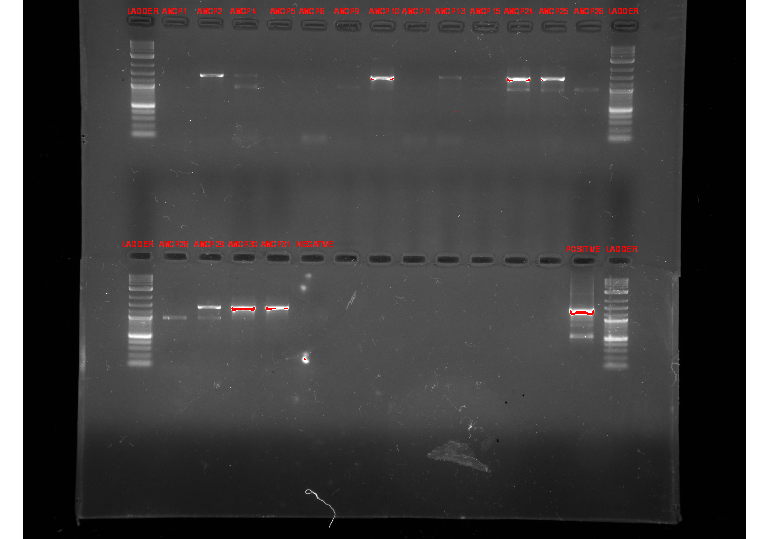
Figure S1- Gel 1; 020524_LSUF-LSU1500_AMCP_NPC


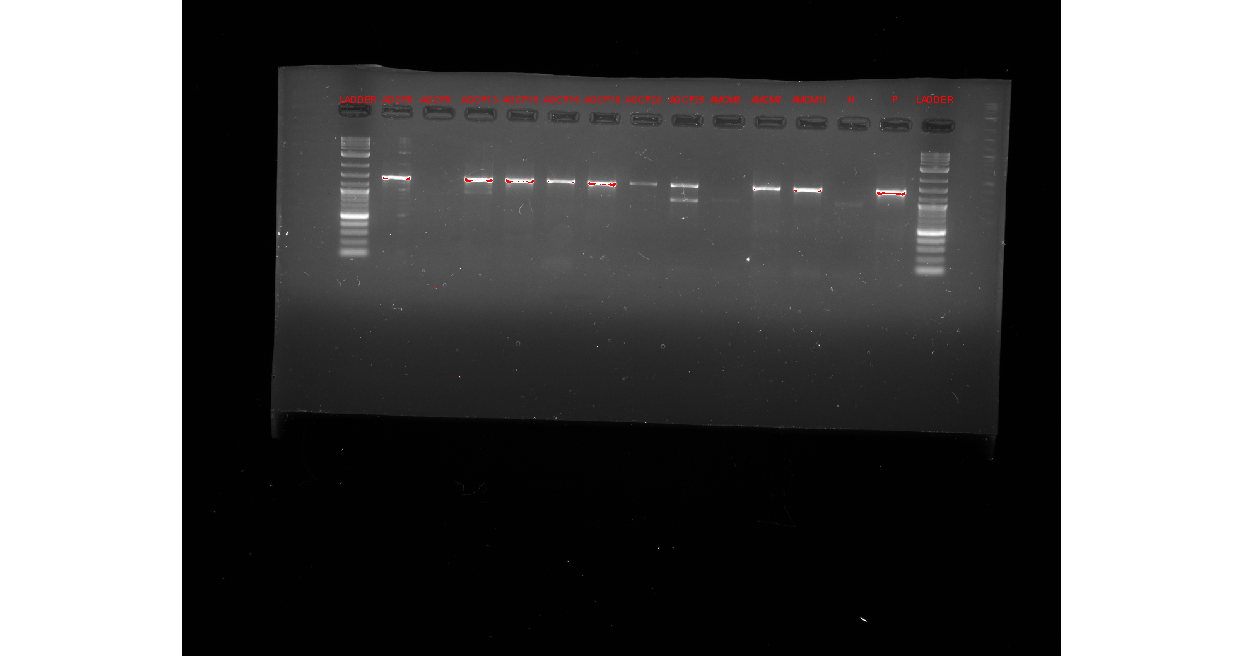
 Figure S2- Gel 2; 070524_LSUF-LSU1500_8AOCP_3AMCM


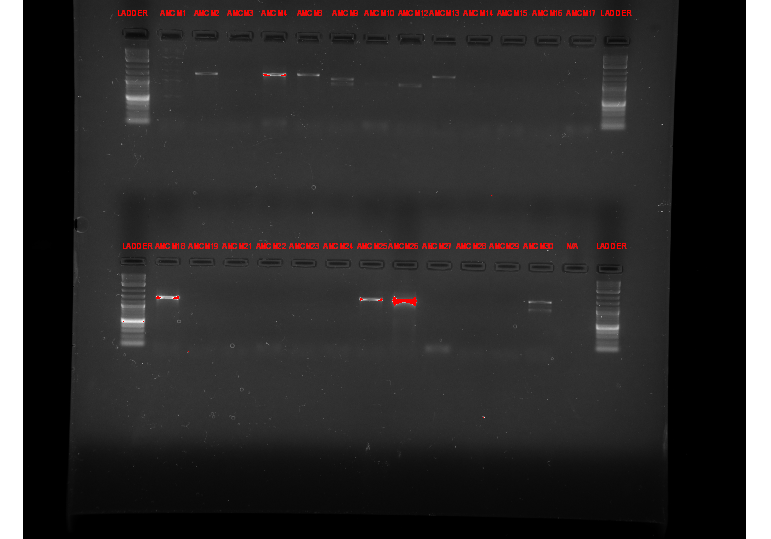


Figure S3- Gel 3; 070524_LSUF-LSU1500_AMCM


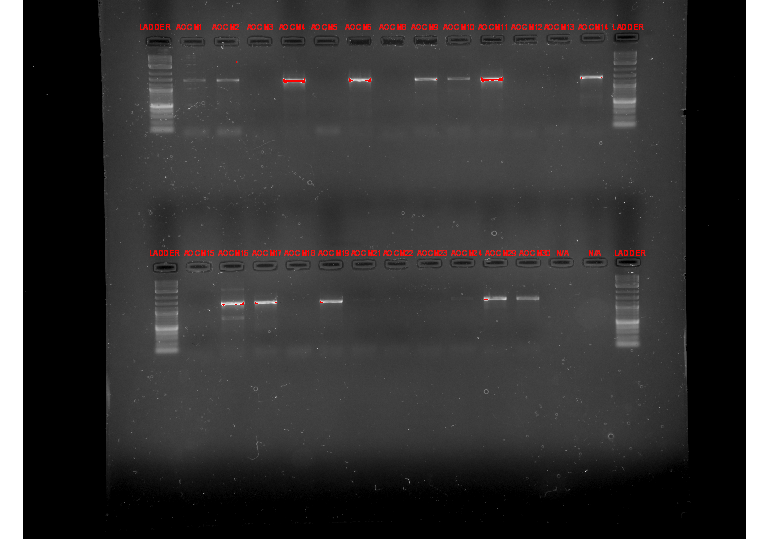


Figure S4- Gel 4; 070524_LSUF-LSU1500_AOCM


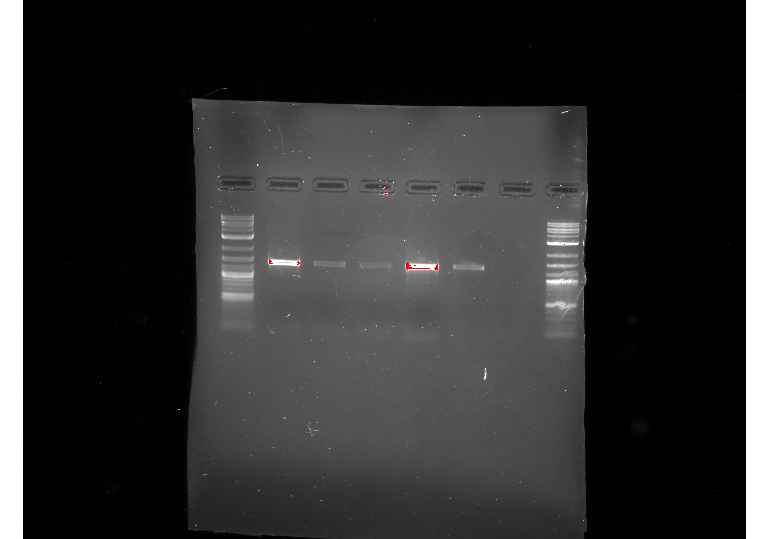


Figure S5- Gel 5; 140824_LSUF-LSU1500_AUCM(I1,I2,I3,I4,p,n)


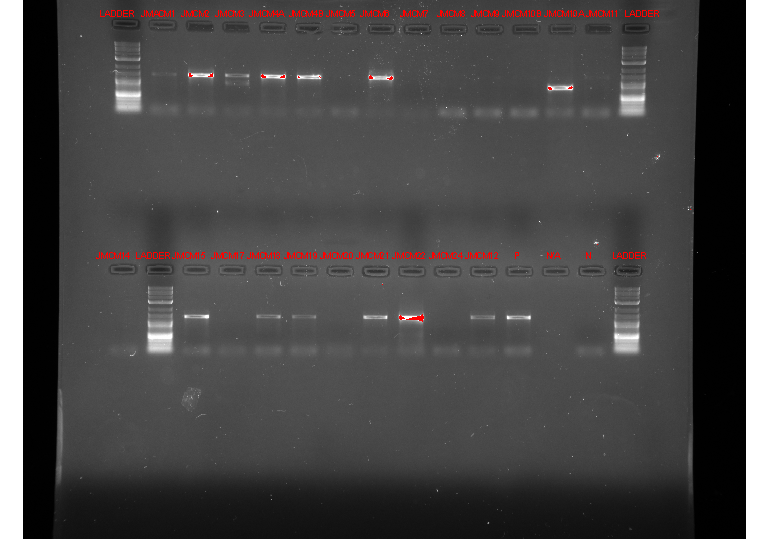


Figure S6- Gel 6; 170624_LSUF-LSU1500_JMCM


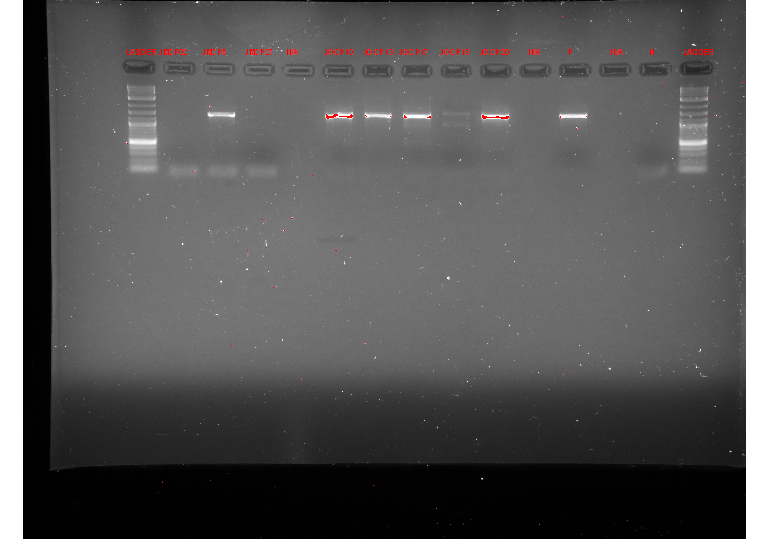


Figure S7- Gel 7; 170624-LSUF-LSU1500_3JMCP_5JOCP


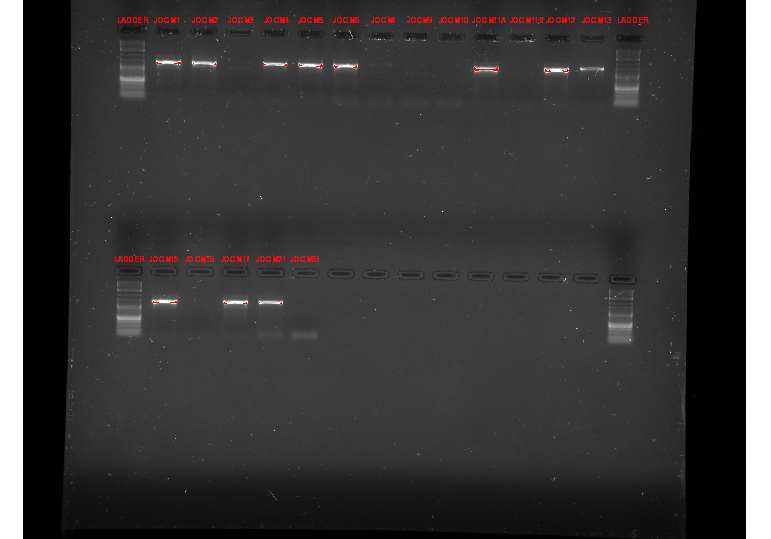


Figure S8- Gel 8; 170624-LSUF-LSU1500_JOCM

*Supplementary Figures S1-8. Agarose gel electrophoresis images of PCR products amplified with LSUF–LSU1500 primers. Eight gels are shown (Gel 1–8), each corresponding to a different batch of samples (see Supplementary Table S4 for sample details). Lanes are labelled in red on each gel to indicate sample order. Sample codes (e.g., AMCP, AMCM, AOCP, JMCM, JOCM, JMCP, JOCP) are provided in Supplementary Table S1 along with their corresponding aliases (e.g., 1, 1a, 1d). Positive and negative controls are included where applicable.*
